# Supplementary material
Source: PubMed Central journal article supplement (PMC7965662)
Supplement: 4188_table.pdf [file 4188_table.pdf]

**On-line Table: Summary of clinical data and imaging findings**

| Case No. | Age (yr)/ Sex | EV Testing | Neurologic Deficits                                                                  | Time from CNS Symptom Onset to MRI (days) | MRI Findings                                                                                                                                                                                                             | Brain Stem              | Spinal Cord    | Diffuse GM vs Anterior Horn | Ventral Nerve Root Enhancement |
|----------|---------------|------------|--------------------------------------------------------------------------------------|-------------------------------------------|--------------------------------------------------------------------------------------------------------------------------------------------------------------------------------------------------------------------------|-------------------------|----------------|-----------------------------|--------------------------------|
| 1        | 7/M           | + RV/EV    | Diplopia, upper and lower extremity weakness                                         | Brain, 2; spine, 3, 38                    | Focal midbrain and dorsal pons lesions; myelitis of the entire spinal cord; diffuse GM involvement; with cord swelling; new enhancement of cervical, lower thoracic, and lumbar ventral nerve roots on follow-up imaging | Midbrain, pons          | C, T, L        | Day 3, GM; day 38, AH       | Day 38, yes                    |
| 2        | 3/M           | + EV-D68   | Left CN VII palsy, right upper extremity weakness                                    | Brain, 1; spine, 2                        | Dorsal pons, right lateral medulla lesions; myelitis of the cervical and upper thoracic cord; diffuse GM involvement                                                                                                     | Pons, medulla           | C, T           | GM                          |                                |
| 3        | 14/M          |            | Bilateral CN VI palsy                                                                | Brain, 2; spine, NA                       | Dorsal pons, midbrain, and medulla lesions. Myelitis of upper cervical cord with diffuse GM involvement <sup>a</sup>                                                                                                     | Midbrain, pons, medulla | C <sup>a</sup> | GM                          |                                |
| 4        | 13/M          |            | Bilateral CN VI palsy; bilateral upper extremity weakness noted 6 weeks into illness | Brain, 5; spine, 6                        | Dorsal pons and medulla lesions; myelitis of the entire spinal cord with diffuse GM involvement                                                                                                                          | Pons, medulla           | C, T, L        | GM                          |                                |
| 5        | 18/M          | + EV-D68   | Bulbar weakness, left upper extremity weakness                                       | Brain, 4; spine, 4                        | Dorsal pons, medulla, and dentate nuclei lesions; myelitis of the entire cervical and upper thoracic cord; anterior horn predominant                                                                                     | Pons, medulla           | C, T           | GM                          |                                |
| 6        | 8/M           | + EV-D68   | Bulbar weakness, bilateral upper and lower extremity weakness                        | Brain, 3; spine, 3                        | Dorsal pons, dentate nuclei lesions; myelitis of entire spinal cord with diffuse GM involvement                                                                                                                          | Pons                    | C, T, L        | GM                          |                                |
| 7        | 10/F          | + EV-D68   | Bilateral CN VII palsy                                                               | Brain, 7; spine, 7                        | Left ventral pons lesion; bilateral CN VII enhancement                                                                                                                                                                   | Pons                    |                |                             |                                |
| 8        | 6/F           |            | Left upper extremity weakness                                                        | Brain, 24; spine, 24                      | Myelitis of the cervical and thoracic spinal cord, anterior horn predominant; ventral nerve root enhancement in cervical cord and cauda equina                                                                           |                         | C, T           | AH                          | Yes                            |
| 9        | 1/M           | + RV/EV    | Bulbar weakness, upper and lower extremity weakness                                  | Brain, 1; spine, 1                        | Dorsal pons, dentate nuclei lesions; myelitis of cervical spinal cord with diffuse GM involvement and cord swelling                                                                                                      | Pons                    | C              | GM                          |                                |
| 10       | 15/F          | + RV/EV    | Mild bulbar weakness, upper and lower extremity weakness                             | Brain, 11; spine, 12                      | Dorsal pons, medulla lesions; myelitis of entire spinal cord, anterior horn predominant; ventral nerve root enhancement in cauda equina                                                                                  | Pons, medulla           | C, T, L        | AH                          | Yes                            |
| 11       | 15/M          | + RV/EV    | Left upper extremity weakness                                                        | Brain, NA; spine, 31                      | Myelitis of the cervical spinal cord, anterior horn predominant; ventral nerve root enhancement                                                                                                                          |                         | C <sup>b</sup> | AH                          | Yes                            |

**Note:**—EV indicates enterovirus; + RV/EV, polymerase chain reaction screen positive for rhinovirus/enterovirus; + EV-D68, positive enterovirus D68 polymerase chain reaction typing; C, cervical; T, thoracic; L, lumbar; GM, diffuse gray matter involvement; AH, focal anterior horn cell involvement; NA, not applicable; CN, cranial nerve.

<sup>a</sup> No dedicated spine MR imaging performed; upper cervical findings are from brain MRI.

<sup>b</sup> No brain, thoracic, or lumbar MR imaging performed.
